# Supplementary material
Source: Elsevier journal article supplement (https://www.sciencedirect.com/science/article/pii/S0210569115002168)
Supplement: mmc1 [file S0210569115002168:mmc1.doc]

**SUPLEMENTO ONLINE**

**ANEXO:**

**CENTROS E INVESTIGADORES PARTICIPANTES EN EL REGISTRO ARIAM-SEMICYUC**

| **Clínica USP Palmaplanas:** Manuel Marín, Francisca Catalina Vallespir Cladera, Marta Freire Pérez  **Complejo Asistencial de Palencia:** Maite Ortega Sáez, Mercedes Martín-Macho González, Juan José Centeno Obando, Belén Román García, Susana Moradillo González  **Complejo Asistencial de Segovia:** José Joaquín Cortina Gómez, Mª Jesús López Gil, Alec Tallet Alfonso  **Complejo Asistencial de Soria:** Oliverio López Gimeno, Christian Sala  **Complejo Asistencial de Zamora:** Ana Carolina Caballero Zirena, Silvia María Cortés Díaz  **Complejo Asistencial Universitario de Burgos:** Oihane Badallo Arévalo, Cristina Carbajales Pérez, Rebeca Vara Arlanzón, Esther Portugal Rodríguez. Silvia Puerto Corrales  **Complejo Hospital San Pedro:** Verónica Díaz de Antoñana Sáenz, M. de la Concepción Pavía Pesquera, Luz Amparo López Montoya, Myriam Ruiz de la Cuesta López, Lidia Martínez Camarero  **Complejo Hospitalario Arquitecto Marcide-Prof. Novoa Santos:** Carmen Josefina Fernández González, Mª José Castro Orjales  **Complejo Hospitalario de Cáceres:** Mª Carmen Sánchez García. Eduardo Corchero Rodríguez, Elena Gallego Curto  **Complejo Hospitalario de Ourense:** Román Rodríguez Álvarez-Granada, Rocío Gómez López, María José de la Torre Fernández, Francisco Javier Cid López  **Complejo Hospitalario del Área de Salud de Mérida:** Fernando Vázquez Fuentes, Isabel Mª Peña Luna  **Complejo Hospitalario Llerena-Zafra:** Hilario Badiola Villa, Segismundo Galván Pérez  **Complejo Hospitalario Nuestra Señora de Valme:** José Antonio Sánchez Román  **Complejo Hospitalario Universitario A Coruña:** Alexandra Ceniceros Barros, María José García Monje, Lidia Pita García  **Complejo Hospitalario Universitario de Cartagena:**  Juan Antonio Fernández Lozano, Ángel Rodríguez García, Ángela Díaz Pastor, Germán Escudero García  **Hospital Arnau de Vilanova:** Moisés Rico Sala, Mercedes García Sanz  **Hospital Clínico Universitario Lozano Blesa:** Emilia Civeira Murillo  **Hospital Comarcal de Vinaròs:** Mº Desamparados Oliva Gimeno, María Carmen Santarrufina Lluch, Fernando J Barrachina Albert, M. Carmen Lorente Cogollos, Gema A. Salinas Reyes  **Hospital Comarcal Valle de los Pedroches:** María José Ferrer Higueras  **Hospital de La A.V.S. Vega Baja:** Cristina Portillo Requena, María Cerón García , María Dolores Martínez Juan, , José David Simón Simón, María Salomé Sánchez Pino, Laura Martínez Peñalver, Julián Adolfo Molina Jaime, Nuria Molina Sánchez  **Hospital de La Marina Baixa:** Juan José Muñoz Coronado, José Mª Carrasco Barea , Pablo Fernández Arroyo, José Vayá Moscardó, María Jesús Prieto Bragado, Luis Ángel Domínguez Quintero, Francisco Mallofré  **Hospital de La Plana:** Elena Porcar Rodado, Rosa Álvaro Sánchez  **Hospital de la Serranía:** Juan Jesús Ríos Toro  **Hospital de Llíria:** Javier Ruíz Ruíz  **Hospital de Manises:** Mónica Talavera, Marisa Micó Gómez  **Hospital de Sabadell:** Xaime García Nogales, Guillem Gruartmoner de Vera, María Consuelo Guía Rambla, Andrey Rodríguez Yakushev  **Hospital de Sagunto:** Regina Calvo Embuena, Manuel Palomo Navarro  **Hospital de Sant Joan de Déu - Althaia:** Josep M Alcoverro Pedrola  **Hospital de Sant Pau I Santa Tecla:** Yolanda del Castillo Durán  **Hospital de Terrassa:** Mª Teresa Jurado Castro, Vanessa Arauzo Rojo, Joaquín Amador Amerigo  **Hospital de Torrejón:** María Cruz Martín Delgado, Mª Victoria Trasmonte Martínez  **Hospital de Torrevieja:** Alberto Márquez de la Plata Panchana, Alberto Fernández Zapata,  **Hospital del Sureste:** Ana María de Pablo Hermida, Patricia Albert de la Cruz, Eva María Hernández Sánchez, Manuel Cruz Tejedor, Esther García Sánchez, Emilio Nevado Losada, Susana Zubillaga, Borja Díez Sáinz  **Hospital del Tajo:** Miriam Chana García  **Hospital del Vinalopo:** David A. Martín Langerwerf, Rafael Carrasco Moreno  **Hospital El Bierzo:** Angeles de Celis Álvarez ,  **Hospital General de Castelló:** Joaquín Arguedas Cervera, Jairo Rodríguez  **Hospital General de Catalunya:** Cristina Mora Jiménez  **Hospital General de Elche:** Eva de Miguel Balsa, Jaime Latour Pérez, Francisco Javier Coves Orts, concepción Picazos Vicente, Ana Llamas Álvarez, Karel Pino Izquierdo, Diana Martínez López, David Ramos Alzamora, Anna Baeza Román, Encarnita Gómez Alcaraz, Antonio D Garrido Servant  **Hospital General de la Defensa de Zaragoza:** Luis Mariano Giner Smith  **Hospital General de L'Hospitalet:** Julian Berrade Zubiri  **Hospital General San Jorge:** Juan Carlos López Claver, José Lorenzo Labarta Monzón, Carlos Serón Arbeloa, Tomás Mallor Bonet, Arantxa Lander Azcona, Jesús Oscar Escós Orta, Mónica Zamora Elson, Isabel Garrido Ramírez de Arellano, María Isabel Marquina Lacueva  **Hospital General Universitario de Alicante:** José Cánovas Robles, Francisco Ángel Jaime Sánchez, Mómica Días Barranco, Laura Medina Ramos  **Hospital General Universitario de Ciudad Real:** María del Carmen Martín Rodríguez, Mariana Portilla Botelho  **Hospital General Universitario Reina Sofía:** Enrique Mira Sánchez, Lisa Ortin Katnich, Fátima Martínez-Lozano Aranaga, Francisco Felices Abad, Carmen Susarte Juliá, José Luis Espinosa , Berenguel, Isabel Mª Cremades Navalón, Martín Vigil Velis, Juan José Rodríguez Mondéjar, César Palazón Sánchez  **Hospital Gral. del Parc Sanitari Sant Joan de Déu:** Alejandra Fernández Trujillo  **Hospital Infanta Elena:** M. Carmen García Torrejón  **Hospital J.M. Morales Meseguer:** Pedro Jara Pérez, Mª Dolores Casado Mansilla, Manuel José Párraga Ramírez, Gonzalo Quintanilla  **Hospital Los Arcos:** María del Pilar Murcia Hernández, Mª Elena Martínez Quintana, Carmen Rita Hernández Romero, María Rosa Navarro Ruíz, Daniel , Francisco Pérez Martínez, Ana María del Saz Ortiz  **Hospital Maz (Mutua de Accidentes de Zaragoza) :** Elena Plumed Serrano, Isabel Yuste Serrano  **Hospital Moncloa:** Vicente Gómez Tello, Juan José Oñoro Cañaveral  **Hospital Nostra Senyora de Meritxell:** Antonio Margarit Ribas  **Hospital Nuestra Señora de Gracia:** Míriam Lafuente Mateo, María José Tolón Herrera, José Ignacio Corchero Martín, Francisco Ruíz Valero , Ruth Noemí Jorge García  **Hospital Obispo Polanco:** José Francisco Luz Gómez de Travecedo  **Hospital Rafael Méndez:** Silvestre Nicolás-Franco, José Higinio de Gea García  **Hospital San Agustín:** Josefa Rengel Jiménez, Marta Martín Cuadrado  **Hospital Santiago Apóstol:** Balziskueta Flórez  **Hospital Universitari Sant Joan d'Alacant:** Cristina Mollá Jiménez, José Luis Antón Pascual  **Hospital Universitario de Ceuta:** Mikel Celaya López  **Hospital Universitario de Guadalajara:** Elena Yáñez Parareda  **Hospital Universitario de la Ribera:** Ana Abalos García, Martín Parejo Montell, Lucía Arias Portaceli, Alicia Barrios Pérez, Juan Fernández Cabrera, Alexandra Guglieri Soler, Alejandra Romero Rodrigo, Lorena Santiago Palomino  **Hospital Universitario de Móstoles:** Sonia Gómez Rosado, Esperanza Sánchez-Brunete Palop  **Hospital Universitario del Henares: I**nés Torrejón Pérez  **Hospital Universitario del Rio Hortega:** Juan José Sanz Hernán, Rubén Herrán Monge, Virginia Fraile Gutiérrez, Ana María Prieto de Lamo, Marta María García García  **Hospital Universitario Dr. Peset:** Luís García Ochando, Mar Criado Pacheco, Salvador Moyano Ruíz, Nerea Buceta Odón, Laura Bellver Bosch, Héctor Hernández Garcés, Rafael Faus Cerdá  **Hospital Universitario Fundación Alcorcón:** Marta Yagüe Huertas, Natalia de la Calle Pedrosa  **Hospital Universitario Infanta Leonor:** Paloma Rico Cepeda  **Hospital Universitario Miguel Servet:** Alejandra Morón Giménez, Jesús Lorente Cortés, Leticia Fernández Salvatierra, Antonio Luis Ruíz Aguilar, Teresa Sanz Gonzalo  **Hospital Universitario Príncipe de Asturias:** María Cristina Martínez Díaz, María Trascasa Muñoz de la Peña, María del Consuelo Pintado Delgado, Beatriz Llorente Ruíz, Cristina Arenillas Juanas , Rocío Molina Montero, Esther López Ramos, Yaiza Ortiz, de Zárate Ansótegui, Jimena Luján Varas, Ana Pardo Guerrero, Madian Manso Álvarez  **Hospital Universitario Severo Ochoa:** Frutos del Nogal Sáez, Estíbaliz Meyer, Miguel Ángel Blasco Navalpotro, José Luis Flordelis Lasierra, Alberto Orejas Gallego, Laura Sanz Sanz, Victoria Benítez Ferreiro, Mónica Fuentes Ponte  **Hospital Universitario Son Espases:** Andrés Carrillo López, Jaime Emilio Herrero Cereceda  **Hospital Universitario Virgen de la Arrixaca:** Silvia Sánchez Camara, Kellys Sofía Arenas López, Luis Arturo Conesa Cayuela, Isabel María Pérez Gómez, Fredmaxsyn Vilchez Pizarro, María Eulalia García García, Miguel Ángel Sánchez Lozano, Mario Royo-Villanova Reparaz,  José Ignacio Pascual de la Parte  **Hospital Universitario y Politécnico la Fe:** Esther Villarreal Tello, María Teresa Gisbert García, María Paz Fuset Cabanes, Isabel Madrid López, Karla Vacacela Cordova, Cristina Calabuig Guillén  **Hospital Valle del Nalón:** Eva Ocampos Martínez, María Rodríguez Junquera, Luís Velasco Álvarez, Sérida Domínguez López  **Hospital Virgen de los Lirios:** Rosa Pérez Mateos  **Hospital Virgen del Puerto:** Antón Arana LLanderal, Eva María Guerra Nevado |
| --- |
