# Supplementary material
Source: Elsevier journal article supplement (https://www.sciencedirect.com/science/article/pii/S0210569115002168)
Supplement: mmc2 [file S0210569115002168:mmc2.doc]

**SUPLEMENTO ONLINE**

S1. Definiciones de las principales variables utilizadas en el estudio (Manual ARIAM versión 2014)

| **NOMBRE DE LA VARIABLE** | **DEFINICIÓN y NOTAS ACLARATORIAS** | **CATEGORÍAS (límites)** |
| --- | --- | --- |
| [Edad] | Variable calculada a partir de las fechas de ingreso y de nacimiento | (entre 18-110 años) |
| Sexo* | Sexo del paciente (al nacimiento) | - Hombre - Mujer |
| Tabaquismo* | No fumador.- Nunca ha fumado o es abstinente más de 20 años.  Fumador actual.- paciente que ha fumado algún cigarrillo en los últimos 30 días. | - Desconocido - No Fumador - Fumador actual (último mes) - Exfumador (< 1 año) - Exfumador (> 1 año) |
| Hipertensión* | Cualquiera de las siguientes:  1. Antecedente de hipertensión arterial en la historia del paciente o bien sigue tratamiento con fármacos, dieta y/o ejercicio para controlar la TA.  2. Documentación previa de TA sistólica ≥140 mmHg y/o TA diastólica ≥ 90 mmHg en pacientes sin diabetes o insuficiencia renal crónica o TA sistólica ≥130 mmHg y/o TA diastólica ≥80 mmHg en al menos 2 ocasiones para pacientes con diabetes o insuficiencia renal crónica.  3. Tratamiento actual de la HTA | - Desconocido/dudoso - Sí - No |
| Dislipemia* | Antecedente de dislipemia consignado en la historia, tratamiento previo o actual con hipocolesterimiantes o documentación de niveles de colesterol >200 mg/dl o LDL≥130 mg/dl o HDL <40 mg/dl en varones y <50 mg/dl n mujeres | - Desconocido/dudoso - Sí - No |
| Diabetes* | Diabetes tipo I: Antecedente de diabetes tipo I en la historia clínica y/o el paciente cumpla criterios de la OMS.  Diabetes tipo II: Antecedente de diabetes tipo II en la historia clínica y/o el paciente cumpla criterios de la OMS. | - Desconocido/dudoso - Diabetes tipo 1 - Diabetes tipo 2 |
| Infarto previo* | Antecedentes de infarto previo, consignados en la Historia clínica del paciente (ver Nueva definición de infarto, más arriba) | - Desconocido/dudoso - Sí - No |
| Lesiones coronarias conocidas* | Existencia de lesiones coronarias significativas (>50%) demostradas mediante coronariografía u otras técnicas de imagen | - Desconocido/dudoso - Sí - No |
| Historia de sangrado* | Antecedentes de hemorragia consignados en la historia clínica. Se incluye la hemorragia intracraneal | - Desconocido/dudoso - Sí - No |
| ACVA* | Antecedente de ictus consignado en la historia clínica. | - Isquémico - Hemorrágico - No - Desconocido/dudoso |
| Arteriopatía periférica* | Historia de arteriopatía obstructiva aorto-femoral y/o clínica de claudicación intermitente no estudiada | - Desconocido/dudoso - Sí - No |
| Insuficiencia Cardiaca* | Diagnóstico clínico consignado como tal en la historia clínica, o síntomas sugestivos como disnea a pequeños esfuerzos, ortopnea recurrente, retención de líquidos o descripción de crepitantes, ingurgitación yugular o edema pulmonar radiológico. La evidencia de fracción de eyección deprimida sin signos clínicos de insuficiencia cardiaca no es suficiente para el diagnóstico de insuficiencia cardiaca. | - Desconocido/dudoso - Sí - No |
| Enfermedad pulmonar obstructiva crónica* | Diagnóstico (confirmado o de sospecha) de asma o EPOC consignado en la historia clínica. | - Desconocido/dudoso - Sí - No |
| Aspirina* | Consumo de aspirina durante al menos en los últimos 7 días | - Desconocido/dudoso - Sí - No |
| Otros antiplaquetarios* |  | - Desconocido - Clopidogrel - Prasugrel - Ticagrelor - Otros |
| Nitratos | Consumo habitual de nitratos al menos en los últimos 7 días | - Desconocido/dudoso - Sí - No |
| Betabloqueantes * | Consumo habitual de betabloqueantes al menos en los últimos 7 días | - Desconocido/dudoso - Sí - No |
| IECAs/ARAII* | Consumo habitual de Inhibidores de la Enzima Convertidora de la Angiotensina o antagonistas ARA-II al menos en los últimos 7 días | - Desconocido/dudoso - Sí - No |
| Estatinas/hipolipemiantes* | Consumo habitual de hipolipemiantes al menos en los últimos 7 días | - Desconocido/dudoso - Sí - No |
| Diuréticos* | Consumo habitual de diuréticos al menos en los últimos 7 días | - Desconocido/dudoso - Sí - No |
| ECG inicial (SCASEST) | Sólo se rellena en SCASEST | - Patrón de tronco/multivaso - Descenso de ST >= 0,5 mm - Descenso ST<0,5 mm - Elevación transitoria ST (<20 min) - Inversión de T - ECG normal - Otros / desconocido |
| TA sistólica/diastólica iniciales (mmHg)* | Consignar la primera determinación en UCI | (entre 20 y 250 la sistólica y entre 20 y 150 la diastólica) |
| Frecuencia cardiaca inicial*: | Consignar la primera determinación en UCI | (entre 0-350 lpm) |
| Killip inicial* | Consignar la primera determinación en UCI | - I - II - III - IV |
| Creatinina al ingreso* | mg/dl | (entre 0,1 y 20) |
| [Puntuación GRACE] | Puntuación GRACE al ingreso (ver link) | <http://www.outcomes-umassmed.org/grace/acs_risk/acs_risk_content.html> |
| [Puntuación TIMI (SCASEST)] | Sólo se rellena en pacientes con SCASEST | <http://www.mdcalc.com/timi-risk-score-for-uanstemi> |
| [Aclaramiento de Creatinina] | Calculado automáticamente por el método de Cockroft | <http://www.mdcalc.com/creatinine-clearance-cockcroft-gault-equation> |
| Destino al alta de UCI |  | - Alta planta - Otro hospital - Alta voluntaria - Exitus |
| Fecha | Fecha del alta hospitalaria. En caso de traslado a otro hospital consignar la fecha de alta del centro de destino, no la del hospital de origen |  |
| Estatus al alta hospitalaria |  | - Desconocido - Vivo - Exitus |
| Fecha del último contacto | Último día sobre el que existen datos del status vital del paciente |  |
| Estatus vital a medio plazo | Estatus del paciente en la fecha del último contacto | - Desconocido - Vivo - Exitus |
| Complicaciones Cardiológicas | Infarto y reinfarto definidos con los Criterios del documento de consenso de 2007:  [http://content.onlinejacc.org/cgi/content/full/50/22/2173#SEC5](http://content.onlinejacc.org/cgi/content/full/50/22/2173" \l "SEC5) | Respuesta múltiple:   - IAM (no dg ppal) - Reinfarto - Angina recurrente - Angina postinfarto - Defecto mecánico   - CIV   - I Mitral aguda   - Rotura cardiaca - HTA - Pericarditis - Taponamiento - Embolismo - TEP - Fracaso cardiaco derecho - Shock - Hipotensión |
| Hemorragias | Según clasificación del GUSTO:   - Grave: hemorragia intracraneal o sangrado que produce compromiso hemodinámico y requiere intervención - Moderada: Hemorragia que requiere transfusión pero no produce compromiso hemodionámico - Leve: Hemorragia que no cumple criterios de grave o moderada | - Desconocido - No - Leve - Moderada - Grave |
| Fracaso renal agudo | Creatinina del suero incrementada 1,5 veces o diuresis < 0,5 ml/kg del peso corporal para 6 horas | - Desconocido - No - Sí |

**S2.- Características basales de los pacientes según GFR**  (%)

|  | **GFR ≥60**  n = 2940 (69%) | **GFR <60 y ≥30**  n = 1125 (26%) | **GFR <30**  n = 214 (5%) | **P** |
| --- | --- | --- | --- | --- |
| Filtrado glomerular (Cockroft) | 98,2 (30,3) | 47,1 (8,2) | 20,0 (7,4) | <0,0001 |
| Disponibilidad Hemodinámica | 955 (32,5%) | 393 (34,9%) | 66 (30,8%) | 0,2589 |
| Hospital privado | 210 (7,1%) | 96 (8,5%) | 14 (6,5%) | 0,2782 |
| Edad | 62,8 (11,9) | 76,7 (7,7) | 74,7 (10,4) | <0,0001 |
| Género (mujeres) | 673 (22,9%) | 427 (38,0%) | 85 (40,0%) | <0,0001 |
| Tabaquismo | 1105 (37,6%) | 162 (14,4%) | 42 (19,6%) | <0,0001 |
| Hipertensión arterial | 907 (30,9%) | 193 (19,2%) | 29 (13,6%) | <0,0001 |
| Dislipemia | 1578 (53,7%) | 683 (61,2%) | 144 (62,3%) | <0,0001 |
| Diabetes mellitus | 817 (27,8%) | 482 (42,8%) | 116 (54,2%) | <0,0001 |
| Infarto de miocardio previo | 650 (22,1%) | 361 (32,1%) | 76 (35,5%) | <0,0001 |
| Arteriopatía | 201 (6,8%) | 155 (13,8%) | 52 (24,3%) | <0,0001 |
| Insuficiencia cardiaca previa | 110 (3,7%) | 127 (11,3%) | 34 (15,9%) | <0,0001 |
| EPOC | 255 (8,7%) | 175 (15,6%) | 29 (13,6%) | <0,0001 |
| Historia de sangrado | 52 (1,8%) | 51 (4,5%) | 12 (5,6%) | <0,0001 |
| Lesiones coronarias conocidas | 597 (20,3%) | 337 (30,0%) | 80 (37,4%) | <0,0001 |
| Primer contacto sanitario:  112/061  Centro de salud  Hospitalizado  Urgencias hospitalarias  Otros | 320 (10,9%)  894 (30,4%)  130 (4,4%)  1415 (48,1%)  181 (6,2%) | 200 (17,8%)  239 (21,2%)  83 (7,4%)  520 (46,2%)  83 (7,4%) | 37 (17,3%)  27 (12,6%)  33 (15,4%)  95 (44,4%)  12 (12,3%) | <0,0001 |
| Tensión arterial sistólica inicial | 140,7 (26,1) | 138,5 (28,5) | 138,4 (31,1) | 0,0464 |
| Tensión arterial diastólica inicial | 78,3 (15,6) | 73,4 (16,2) | 73,1 (17,4) | <0,0001 |
| Frecuencia cardiaca inicial | 77,6 (19,2) | 82,4 (23,0) | 85,4 (21,3) | <0,0001 |
| ECG al ingreso:  ECG normal  Desviación ST>0,5 mm  Desviación ST<0,5 mm  Elevación transitoria ST  Inversión de T  Patrón multivaso  Otros | 416 (14,2%)  696 (23,7%)  349 (11,9%)  238 (8,1%)  653 (22,2%)  73 (2,5%)  515 (17,5%) | 88 (7,8%)  330 (29,3%)  149 (13,2%)  77 (6,8%)  166 (14,8%)  37 (24,5%)  278 (24,5%) | 12 (5,6%)  78 (36,5%)  34 (15,9%)  9 (4,2%)  35 (16,4%)  9 (4,2%)  37 (17,3%) | <0,0001 |
| KILLIP al ingreso  1  2  3 | 2526 (85,9%)  283 (9,6%)  131 (4,5%) | 704 (62,6%)  241 (21,4%)  180 (16,0%) | 105 (49,4%)  47 (22,0%)  62 (29,0%) | <0,0001 |
| TIMI | 2,3 (1,2) | 3,0 (1,2) | 3,2 (1,2) | <0,0001 |
| GRACE | 124 (33,4) | 164 (32,7) | 181 (37,1) | <0,0001 |
| CRUSADE | 33,7 (16,8) | 51,3 (11,2) | 61,3 (9,5) | <0,0001 |
| Uso previo aspirina | 962 (32,7%) | 500 (44,4%) | 102 (47,7%) | <0,0001 |
| Uso previo otros antiagregantes | 367 (12,5%) | 244 (21,7%) | 67 (31,3%) | <0,0001 |
| Uso previo beta-bloqueantes | 746 (25,4%) | 404 (35,9%) | 98 (45,8%) | <0,0001 |
| Uso previo IECAs | 1134 (38,6%) | 625 (55,6%) | 113 (52,8%) | <0,0001 |
| Uso previo hipolipemiantes | 1123 (41,6%) | 640 (56,9%) | 131 (61,2%) | <0,0001 |
| Uso previo diuréticos | 417 (14,2%) | 386 (34,3%) | 83 (38,8%) | <0,0001 |
| Uso previo nitratos | 281 (9,6%) | 226 (20,1%) | 49 (22,9%) | <0,0001 |
| Retraso hasta el ingreso (min) | 639 (494) | 687 (561) | 718 (561) | 0,0043 |

**S3.- Caracterización de las pérdidas en el seguimiento**

|  | **Estrategia conservadora**  (n = 2204) | | | **Estrategia invasiva de rutina** (n = 2075) | | |
| --- | --- | --- | --- | --- | --- | --- |
|  | **Incluidos**  (n= 1.965) | **perdidos**  (n = 239) | **p** | **Incluidos**  (n = 1897) | **perdidos**  (n =178) | **p** |
| DISPONIBILIDAD HEMODINÁMICA | 462 (23.5%) | 52 (21.8%) | 0.5448 | 788 (41.5%) | 112(62.9%) | <0.0001 |
| HOSPITAL PRIVADO | 162 (8.2%) | 59 (24.7%) | <0.0001 | 96 (5.1%) | 3 (1.7%) | 0.0434 |
| GENERO (mujer) | 593 (30.2%) | 53 (22.2%) | 0.0103 | 492 (25.4%) | 47 (26.4%) | 0.8915 |
| TABACO | 510 (26.0%) | 81 (33.9%) | 0.0089 | 653 (34.4%) | 65 (36.5%) | 0.5744 |
| HIPERTENSIÓN | 533 (27.1%) | 64 (26.8%) | 0.9094 | 492 (25.9%) | 40 (22.5%) | 0.3116 |
| DISLIPEMIA | 1145 (58.3%) | 131 (54.8%) | 0.3066 | 1035 (54.6%) | 100 (8.8%) | 0.678 |
| DIABETES | 696 (35.4%) | 82 (34.3%) | 0.7345 | 587 (30.9%) | 50 (28.1%) | 0.43 |
| INFARTO PREVIO | 549 (27.9%) | 69 (28.9%) | 0.7621 | 437 (23.0%) | 32 (18.0%) | 0.1228 |
| ARTERIOPATIA | 208 (10.6%) | 25 (10.5%) | 0.9527 | 158 (8.3%) | 17 (9.6%) | 0.5749 |
| INSUFICIENCIA CARDIACA PREVIA | 175 (8.9%) | 17 (7.1%) | 0.3534 | 75 (4.0%) | 4 (2.3%) | 0.2553 |
| EPOC | 242 (12.3%) | 15 (6.3%) | 0.006 | 186 (9.8%) | 16 (9.0%) | 0.7254 |
| H DE SANGRADO | 68 (3.5%) | 9 (3.8%) | 0.8083 | 36 (1.9%) | 2 (11.1%) | 0.4614 |
| LESIONES CORONARIAS CONOCIDAS | 517 (26.3%) | 53 (22.2%) | 0.1681 | 415 (21.9%) | 29 (16.3%) | 0.0824 |
| ECG INICIAL | 256 (13.0%)  483 (24.6%)  259 (13.2%)  116 (5.9%)  397 (20.2%)  40 (2.0%) | 25 (10.5%)  61 (25.2%)  22 (9.2%)  15 (6.3%)  36 (15.1%)  2 (0.8%) | 0.0017 | 220 (11.6%)  511 (26.9%)  227 (12.0%)  175 (9.2%)  377 (19.9%)  69 (3.6%) | 15 (8.4%)  49 (27.5%)  24 (13.5%)  18 (10.1%)  44 (24.7%)  8 (4.5%) | 0.3054 |
| KILLIP INICIAL | 1441 (73.3%)  300 (15.3%)  224 (11.4%) | 150 (62.8%)  55 (23.0%)  34 (14.2%) | 0.0018 | 1593 (84.0%)  196 (10.3%)  108 (5.7%) | 151 (84.8%)  20 (11.2%)  7 (3.9%) | 0.5909 |
| TIMI | 2.62 | 2.50 | 0.1533 | 2.44 | 2.30 | 0.1367 |
| USO PREVIO ASPIRINA | 772 (39.3%) | 95 (39.8%) | 0.8903 | 646 (34.1%) | 51 (28.7%) | 0.1445 |
| USO PREVIO OTROS ANTIAGREGANTES |  |  |  |  |  |  |
| USO PREVIO NITRATOS | 314 (16.0%) | 32 (13.4%) | 0.2986 | 193 (10.2%) | 17 (9.6%) | 0.792 |
| USO PREVIO BETA-BLOQUEANTES | 637 (32.4%) | 67 (28.0%) | 0.1699 | 504 (26.6%) | 40 (22.5%) | 0.2348 |
| USO PREVIO IECAS | 890 (45.3%) | 114 (47.7%) | 0.4807 | 788 (41.5%) | 80 (44.9%) | 0.3786 |
| USO PREVIO HIPOLIPEMIANTES | 984 (50.1%) | 118 (49.4%) | 0.8372 | 819 (43.2%) | 73 (41.0%) | 0.5774 |
| USO PREVIO DIURÉTICOS | 466 (23.7%) | 55 (23.0%) | 0.8093 | 334 (17.6%) | 31 (17.4%) | 0.949 |
| GRACE 2 NIVELES | 971 (49.4%) | 113 (47.3%) | 0.5331 | 729 (38.4%) | 70 (39.3%) | 0.8141 |
| GFR | 76.6 | 75.4 | 0.6371 | 85.4 | 87.4 | 0.4921 |
| EDAD | 68.4 | 67.4 | 0.2051 | 65.7 | 65.5 | 0.8156 |
| TA SISTOLICA INICIAL | 139.9 | 141.5 | 0.3948 | 139.7 | 143.3 | 0.0801 |
| TA DIASTÓLICA INICIAL | 76.2 | 79.0 | 0.0145 | 77.1 | 77.1 | 0.9418 |
| FRECUENCIA CARDIACA INICIAL | 80.6 | 82.4 | 0.2321 | 77.5 | 77.8 | 0.8555 |
| GRACE | 142.2 | 141.7 | 0.835 | 133.5 | 130.8 | 0.3428 |
| CRUSADE | 41.2 | 42.5 | 0.3041 | 37.6 | 41.3 | 0.0062 |

**S4.-** VARIABLES INCLUIDAS EN EL ESCORE DE PROPENSIÓN:

1. GFR (variable continua)
2. Disponibilidad de hemodinámica en el centro (dicotómica)
3. Hospital privado (dicotómica)
4. Edad (quintiles, codificados con 4 variables dummy)
5. Sexo (dicotómica)
6. Año del ingreso (codificado con 3 variables dummy)
7. Consumo de tabaco (dicotómica)
8. Antecedentes de hipertensión arterial (dicotómica)
9. Antecedentes de dislipemia (dicotómica)
10. Antecedentes de diabetes mellitus (dicotómica)
11. Infarto de miocardio previo (dicotómica)
12. Arteriopatía (dicotómica)
13. Insuficiencia cardiaca previa (dicotómica)
14. Enfermedad pulmonar obstructiva crónica (dicotómica)
15. Historia de sangrado (dicotómica)
16. Lesiones coronarias conocidas (dicotómica)
17. Lugar del primer contacto sanitario (codificado con 4 variables dummy): Urgencias hospitalarias, 112/061, Centro de Salud, Paciente hospitalizado, Otros
18. Presión arterial sistólica al ingreso (variable continua)
19. Presión arterial diastólica al ingreso (variable continua)
20. Frecuencia cardiaca al ingreso (variable continua)
21. ECG inicial (codificado con 5 variables dummy: ECG normal, Desviación ST>0,5 mm, Desviación ST<0,5 mm, Elevación transitoria ST, Inversión de T, Patrón de tronco/multivaso
22. Grupo de Killip inicial
23. Puntuación TIMI (codificada con 5 variables dummy)
24. Puntuación GRACE (quintiles, codificado con 4 variables dummy).
25. Puntuación CRUSADE (quintiles, codificados con 4 variables dummy)
26. Consumo previo de aspirina (dicotómica)
27. Consumo previo de otros antriagregantes
28. Consumo previo de nitratos (dicotómica)
29. Consumo previo de betabloqueantes (dicotómica)
30. Consumo previo de IECAS/ARA-II (dicotómica)
31. Consumo previo de hipolipemiantes (dicotómica)
32. Consumo previo de diuréticos (dicotómica)
33. Retraso (en minutos) desde el comienzo de los síntomas hasta el primer contacto sanitario (variable continua)

**S5.- Análisis de subgrupos** [[1]](#footnote-2)

|  | **GFR <60** | **GFR ≥60** | **p interaccion (columnas)** |
| --- | --- | --- | --- |
| **GRACE >140** | **0,445 (0,259 a 0,764)** | **0,232 (0,095 a 0,564)** | **0,2205** |
| **GRACE ≤140** | **0,74 (0,16 a 3,53)** | **1,01 (0,23 a 4,49)** | **0,7989** |
| **p interacción (filas)** | **0,543** | **0,096** |  |
|  | | | |
| **Mujeres** | **0,40 (0,135 a 1,189)** | **0,302 (0,079 a 1,152)** | **0,7496** |
| **Varones** | **0,457 (0,254 a 0,820)** | **0,401 (0,187 a 0,859)** | **0,7899** |
| **p interacción (filas)** | **0,8326** | **0,7185** |  |
|  | | | |
| **Disponibilidad de Hemodinámica** | **0,58 (0,28 a 1,19)** | **1,18 (0,43 a 3,23)** | **0,262** |
| **No disponibilidad de Hemodinámica** | **0,42 (0,208 a 0,851)** | **0,145 (0,039 a 0,544)** | **0,163** |
| **p interacción (filas)** | **0,531** | **0,0133** |  |

**Figura S1.- Distribución de la puntuación de propensión en pacientes tratados de forma invasiva/conservadora:**

**A: GFR >=60**

**B) GFR <60**

**Figura S2.- Diferencias estandarizadas entre cohortes emparejadas**

1. **GFR <60**


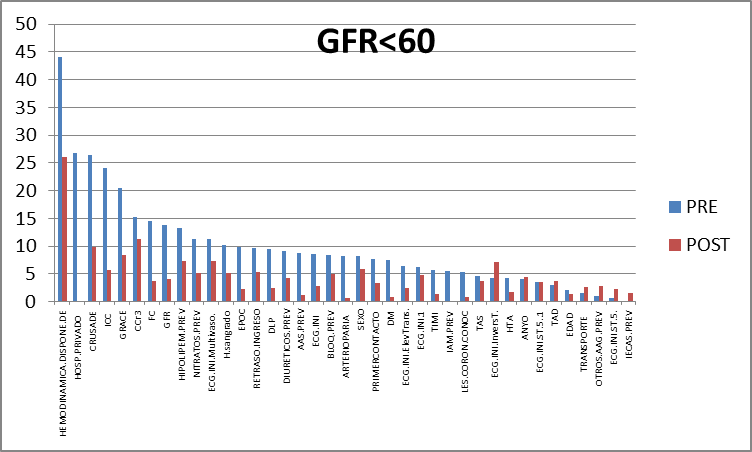


1. **GFR >=60**


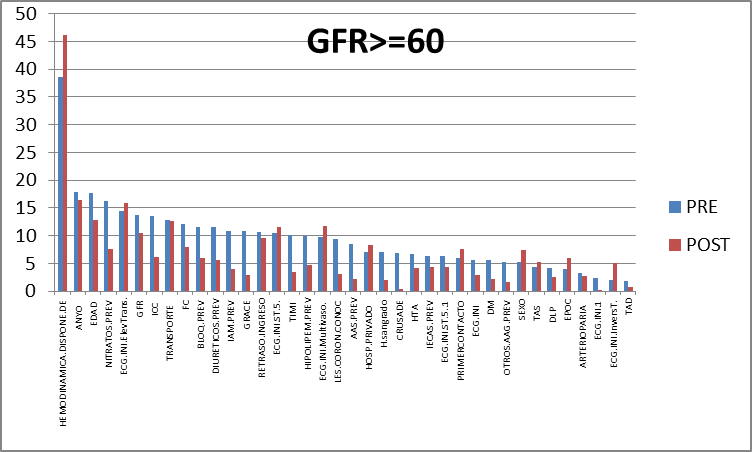


**Figura S3.- Efecto de la EIR (mortalidad hospitalaria): Análisis de propensión estratificado por función renal**

**
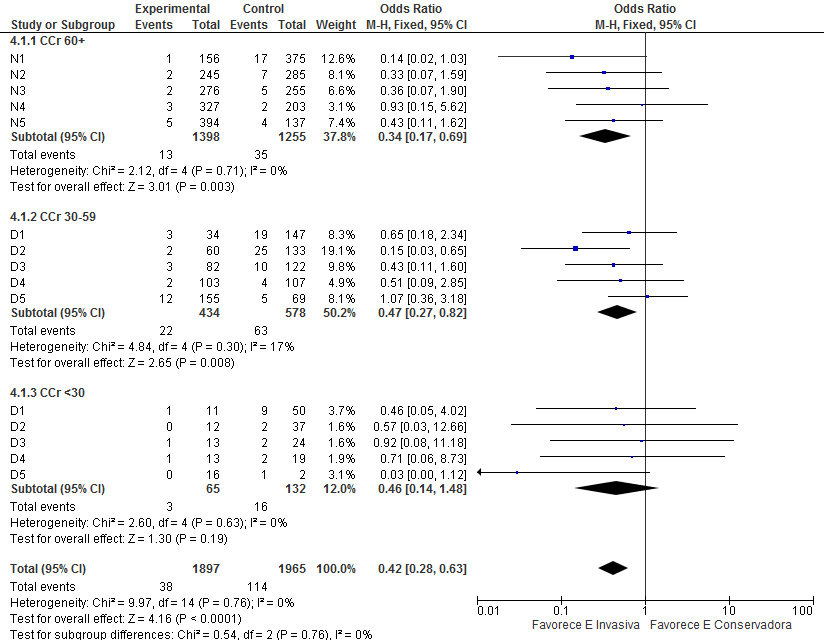
**

**---**

1. Odds ratio ajustadas por estratificación [↑](#footnote-ref-2)
